# Supplementary material for: Hysteroscopic resection of a uterine caesarean scar defect (niche) in women with postmenstrual spotting: a randomised controlled trial
Source: PubMed Central journal article supplement — BJOG. 2017 Jul 5;125(3):326–34. doi: 10.1111/1471-0528.14733 (PMC5811899; doi:10.1111/1471-0528.14733), 2017-07-05
Supplement: BJO-125-326-s001.pdf [file BJO-125-326-s001.pdf]

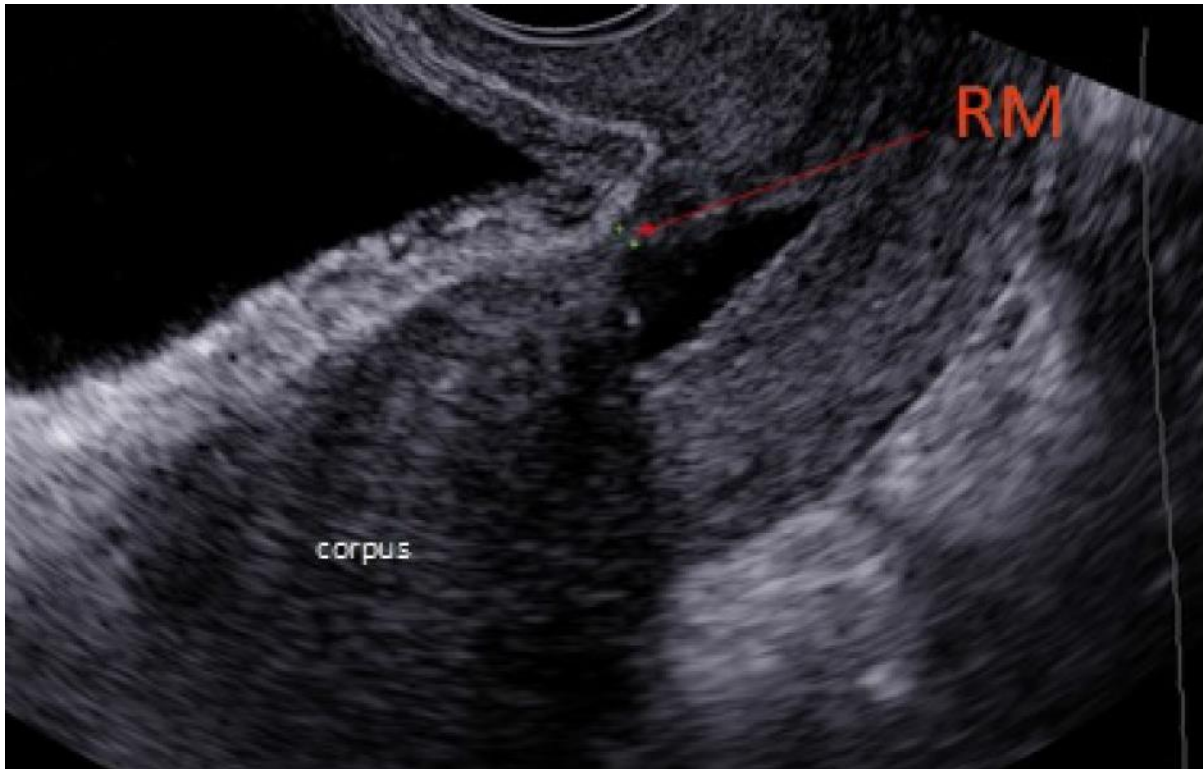

**Figure S1.** Niche during sonohysterography before the intervention.

The niche was measured with transvaginal sonography and SIS or GIS in the sagittal plane, where the largest niche was visible, and in the transversal plane, where the niche was largest (i.e. with the thinnest residual myometrium).
