# Supplementary material for: Hysteroscopic resection of a uterine caesarean scar defect (niche) in women with postmenstrual spotting: a randomised controlled trial
Source: PubMed Central journal article supplement — BJOG. 2017 Jul 5;125(3):326–34. doi: 10.1111/1471-0528.14733 (PMC5811899; doi:10.1111/1471-0528.14733), 2017-07-05
Supplement: BJO-125-326-s003.pdf [file BJO-125-326-s003.pdf]

**Table S1.** Surgical outcomes

| <b>Characteristic</b>             | <b>Intervention (n=45)</b> |
|-----------------------------------|----------------------------|
| Anesthesia                        |                            |
| <i>Epidural / spinal</i>          | 17 (37.8%)                 |
| <i>General</i>                    | 28 (62.2%)                 |
| Operating time (minutes)          | 19.5 (14-25)               |
| Fluid deficit (milliliters)       | 200 (100-488)              |
| Resection distal rim              | 41 (91.1%)                 |
| Coagulation niche surface         | 40 (88.9%)                 |
| Complications during intervention | 0                          |
| Complications after intervention  |                            |
| <i>PID / Endometritis</i>         | 1 (2.2%)                   |
| Ambulant treatment                | 45 (100%)                  |

*Data are reported as 'n (valid percentage)' or as 'median (IQR)'.*
