# Supplementary material for: Hysteroscopic resection of a uterine caesarean scar defect (niche) in women with postmenstrual spotting: a randomised controlled trial
Source: PubMed Central journal article supplement — BJOG. 2017 Jul 5;125(3):326–34. doi: 10.1111/1471-0528.14733 (PMC5811899; doi:10.1111/1471-0528.14733), 2017-07-05
Supplement: BJO-125-326-s004.pdf [file BJO-125-326-s004.pdf]

**Table S2.** Post hoc analysis

| <b>Outcomes</b>                                | <b>Intervention</b> | <b>Control</b> | <b>P-value</b> |
|------------------------------------------------|---------------------|----------------|----------------|
| <b><i>Sensitivity analysis</i></b>             | n=41                | n=35           |                |
| Total days of spotting *                       | 5 (2-7)             | 7 (5-11)       | <b>0.03</b>    |
| <b><i>Last observation carried forward</i></b> | n=51                | n=44           |                |
| Total days of spotting *                       | 4 (2-7)             | 7 (4-11)       | <b>0.01</b>    |

*Data are reported as 'median (IQR)'. In the sensitivity analysis all women with amenorrhoea (due to continuous use of hormonal medication or pregnancy) were excluded.*

*In the analysis using the 'last observation carried forward'- method, baseline data were carried to the six month follow-up of 4 women of the control group who underwent additional surgical treatment before three months follow-up. Three month follow-up data were carried to the six month follow-up data of 9 women of the control group who underwent additional surgical treatment between three and six months follow-up.*
