# Supplementary material for: Hysteroscopic resection of a uterine caesarean scar defect (niche) in women with postmenstrual spotting: a randomised controlled trial
Source: PubMed Central journal article supplement — BJOG. 2017 Jul 5;125(3):326–34. doi: 10.1111/1471-0528.14733 (PMC5811899; doi:10.1111/1471-0528.14733), 2017-07-05
Supplement: BJO-125-326-s005.pdf [file BJO-125-326-s005.pdf]

**Table S3.** Additional therapies, by intention-to-treat analysis

| <b>Characteristic</b>                                                | <b>Intervention<br/>n=51</b> | <b>Control<br/>n=44</b> | <b>P-value</b>   |
|----------------------------------------------------------------------|------------------------------|-------------------------|------------------|
| <b><i>Hormonal contraception</i></b>                                 |                              |                         |                  |
| OC with monthly bleeding                                             | 2 (4.2%)                     | 3 (7.3%)                |                  |
| <u>Levonorgestrel</u> IUD                                            | 5 (10.4%)                    | 3 (7.3%)                |                  |
| Contraception continuously *                                         | 3 (6.3%)                     | 3 (7.3%)                |                  |
| Total hormonal additional treatment                                  | 10 (20.8%)                   | 9 (22.0%)               | 0.99             |
| <b><i>Surgical additional treatment</i></b>                          |                              |                         |                  |
| Hysteroscopic niche resection                                        | 0                            | 9 (22.0%)               |                  |
| Endometrium ablation                                                 | 0                            | 2 (4.9%)                |                  |
| Transcervical resection fibroid                                      | 0                            | 1 (2.4%)                |                  |
| Total laparoscopic hysterectomy                                      | 0                            | 1 (2.4%)                |                  |
| Total surgical interventions                                         | 0                            | 13 (31.7%)              | <b>&lt; 0.01</b> |
| Total surgical interventions (without hysteroscopic niche resection) | 0                            | 4 (9.8%)                | 0.05             |

Data are reported as 'n (valid percentage)' or as 'median (IQR)'. Analyses are by intention to treat.

\* Contraception continuously = Continuous use of oral contraception, Depot provera or GnRh agonist
