# Supplementary material for: Hysteroscopic resection of a uterine caesarean scar defect (niche) in women with postmenstrual spotting: a randomised controlled trial
Source: PubMed Central journal article supplement — BJOG. 2017 Jul 5;125(3):326–34. doi: 10.1111/1471-0528.14733 (PMC5811899; doi:10.1111/1471-0528.14733), 2017-07-05
Supplement: BJO-125-326-s006.pdf [file BJO-125-326-s006.pdf]

**Table S4.** Ultrasound findings at three months follow-up

|                                       | <i>Transvaginal ultrasonography</i> |                               |                | <i>Sonohysterography</i>           |                               |                |
|---------------------------------------|-------------------------------------|-------------------------------|----------------|------------------------------------|-------------------------------|----------------|
|                                       | <b>Intervention</b><br><b>n=51</b>  | <b>Control</b><br><b>n=44</b> | <b>P-value</b> | <b>Intervention</b><br><b>n=51</b> | <b>Control</b><br><b>n=44</b> | <b>P-value</b> |
| Performed in<br>number of women       | 36 (70.6%)                          | 23 (52.3%)                    |                | 24 (47.1%)                         | 13 (29.5%)                    |                |
| <b><i>Sagittal measurement</i></b>    |                                     |                               |                |                                    |                               |                |
| Depth (mm)                            | 4.5 (3.6 – 5.9)                     | 4.5 (3.5-7.0)                 | 0.64           | 5.0 (2.9-7.8)                      | 7.1 (4.0-8.0)                 | 0.32           |
| Residual<br>myometrium (mm)           | 4.0 (3.0 – 5.9)                     | 4.4 (3.4 – 6.9)               | 0.30           | 4.4 (3.1-6.0)                      | 4.0 (3.1-5.9)                 | 0.70           |
| <b><i>Transversal measurement</i></b> |                                     |                               |                |                                    |                               |                |
| Depth (mm)                            | 4.1 (2.7-6.7)                       | 5.0 (3.2 – 7.0)               | 0.26           | 4.5 (3.4-7.0)                      | 6.8 (4.6-8.7)                 | 0.23           |
| Residual<br>myometrium (mm)           | 5.4 (4.3-6.6)                       | 4.1 (3.3 – 6.9)               | 0.39           | 4.8 (3.8-7.0)                      | 6.0 (3.3-8.0)                 | 0.53           |
| Intrauterine fluid                    | 6 (16.2%)                           | 6 (26.1%)                     | 0.35           | n.a.                               | n.a.                          |                |

*Values are in mm. Data are reported as 'n (valid percentage) or as 'median (IQR)'. Analyses are by intention to treat.*
