# Supplementary figures and images for: Hysteroscopic resection of a uterine caesarean scar defect (niche) in women with postmenstrual spotting: a randomised controlled trial
Source: PubMed Central journal article supplement — BJOG. 2017 Jul 5;125(3):326–34. doi: 10.1111/1471-0528.14733 (PMC5811899; doi:10.1111/1471-0528.14733), 2017-07-05

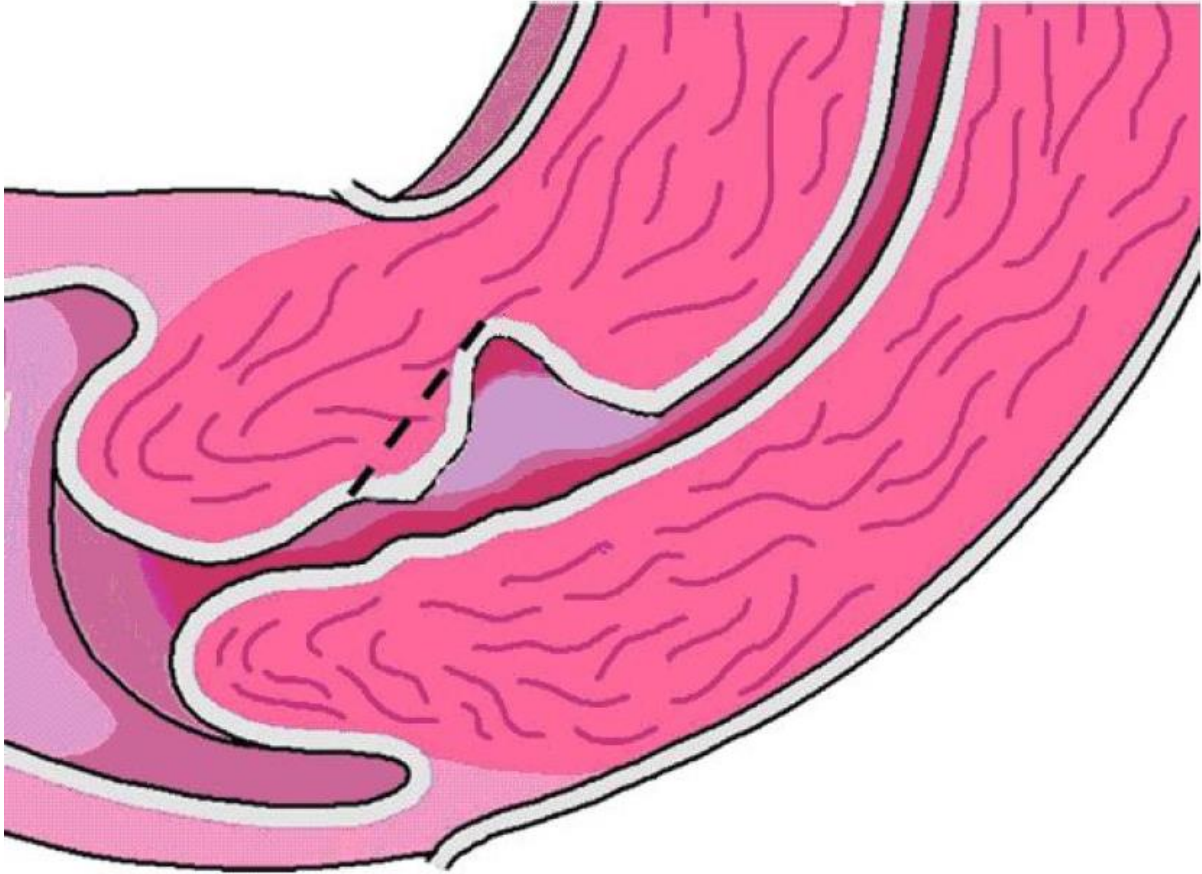

Adapted from Gubbini et al. 2008 (23) and v.d. Voet et al. (16).

**Figure S2.** Resection of the distal part of the niche

Supplement: BJO-125-326-s002.pdf [file BJO-125-326-s002.pdf]
